# Supplementary material for: The partial molar heat capacities and volumes of some N-acetyl amino acid amides in aqueous solution over the temperature range 288.15 to 328.15 K
Source: Royal Society of Chemistry journal article supplement (doi:10.1039/a910296p), 2000-01-01
Supplement: tables.doc [file tables.doc]

**Table S1** Densities, apparent molar volumes and apparent molar heat capacities of aqueous solutions of N-acetylglycinamide at 288.15, 313.15, and 328.15 K

| m/mol kg–1 | /g cm–3 | V/cm3 mol–1 | C, /J K–1 mol–1 |
| --- | --- | --- | --- |
| 288.15 K | | | |
| 0.17983  0.16528  0.14831  0.13731  0.12012  0.10943  0.09107  0.07779  0.06458 | 1.003745  1.003373  1.002942  1.002659  1.002218  1.001942  1.001465  1.001124  1.000781 | 89.94 (0.02)a  89.95 (0.02)  89.93 (0.02)  89.95 (0.02)  89.95 (0.03)  89.96 (0.03)  90.01 (0.03)  89.99 (0.04)  90.01 (0.05) | 219.7 (2.2)a  219.3 (2.0)  221.3 (1.7)  221.9 (1.6)  221.1 (2.4)  221.9 (1.9)  216.9 (2.2)  220.9 (2.9)  220.5 (2.0) |
| 313.15 K | | | |
| 0.17987  0.16519  0.14978  0.13457  0.11991  0.10789  0.09182  0.07711  0.06104  0.04726  0.03687 | 0.996523  0.996179  0.995812  0.995453  0.995103  0.994817  0.994432  0.994079  0.993695  0.993362  0.993111 | 92.32 (0.02)  92.31 (0.02)  92.33 (0.02)  92.32 (0.02)  92.33 (0.03)  92.33 (0.03)  92.34 (0.03)  92.36 (0.04)  92.33 (0.05)  92.36 (0.07)  92.37 (0.08) | 265.2 (1.5)  266.4 (1.4)  264.7 (1.6)  265.9 (1.7)  264.3 (2.4)  264.5 (1.9)  265.7 (2.4)  265.2 (3.4)  265.3 (2.3)  -  - |

Table 1 (contd)

| 328.15 K | | | |
| --- | --- | --- | --- |
| 0.18024  0.16470  0.15075  0.13449  0.11974  0.10863  0.09199  0.07666  0.06062  0.04721 | 0.989877  0.989522  0.989203  0.988826  -  0.988234  0.987845  0.987492  0.987117  0.986807 | 93.53 (0.02)  93.53 (0.02)  93.53 (0.02)  93.55 (0.02)  -  93.52 (0.03)  93.56 (0.03)  93.52 (0.04)  93.54 (0.05)  93.48 (0.07) | 280.3 (1.3)  281.8 (2.3)  280.7 (1.3)  280.0 (2.3)  278.9 (1.3)  277.0 (2.5)  282.3 (3.4)  278.4 (2.5)  278.5 (4.1)  281.3 (2.9) |

a Estimated uncertainties are in parentheses.

**Table S2** Densities, apparent molar volumes and apparent molar heat capacities of aqueous solutions of N-acetylalaninamide at 288.15, 313.15, and 328.15 K

| m/mol kg–1 | /g cm–3 | V/cm3 mol–1 | C, /J K–1 mol–1 |
| --- | --- | --- | --- |
| 288.15 K | | | |
| 0.17997  0.16567  0.14921  0.13530  0.12237  0.10440  0.09032  0.07536  0.05923 | 1.003183  1.002862  1.002496  1.002182  1.001891  1.001486  1.001164  1.000826  1.000458 | 107.11 (0.02)a  107.12 (0.02)  107.11 (0.02)  107.12 (0.02)  107.13 (0.03)  107.13 (0.03)  107.16 (0.03)  107.15 (0.04)  107.17 (0.05) | 328.8 (1.5)a  330.2 (1.7)  330.4 (1.4)  329.9 (2.0)  329.1 (2.2)  329.6 (1.9)  329.9 (2.2)  328.1 (2.5)  330.7 (2.2) |
| 313.15 K | | | |
| 0.19213  0.17955  0.16693  0.14980  0.13641  0.11970  0.10328  0.09066  0.08485  0.07505  0.06504  0.06018  0.04929  0.03444 | -  0.996000  0.995734  0.995381  0.995105  0.994757  0.994410  0.994146  -  0.993820  -  0.993507  0.993275  0.992959 | -  109.36 (0.02)  109.39 (0.02)  109.38 (0.02)  109.36 (0.02)  109.35 (0.03)  109.38 (0.03)  109.37 (0.03)  -  109.33 (0.04)  -  109.29 (0.05)  109.29 (0.06)  109.26 (0.09) | 364.8 (1.2)  364.3 (1.7)  364.0 (1.4)  364.1 (2.0)  364.3 (1.6)  362.4 (1.9)  364.7 (2.1)  364.6 (2.9)  362.2 (2.5)  362.3 (2.7)  364.4 (2.9)  364.0 (3.3)  -  - |

Table 2 (contd)

| 328.15 K | | | |
| --- | --- | --- | --- |
| 0.16538  0.14955  0.13582  0.12212  0.10399  0.08985  0.07487  0.05979  0.04597 | 0.989064  0.988750  0.988474  0.988194  0.987826  0.987536  0.987238  0.986922  0.986645 | 110.70 (0.02)  110.68 (0.02)  110.68 (0.02)  110.70 (0.03)  110.72 (0.03)  110.75 (0.04)  110.67 (0.04)  110.80 (0.05)  110.69 (0.07) | 372.8 (1.2)  372.5 (2.2)  372.1 (1.8)  370.3 (2.8)  369.8 (2.3)  372.7 (4.0)  371.9 (3.1)  375.1 (3.0)  368.3 (2.8) |

a Estimated uncertainties are in parentheses.

**Table S3** Densities, apparent molar volumes and apparent molar heat capacities of aqueous solutions of N-acetylvalinamide at 288.15, 298.15, 313.15, and 328.15 K

| m/mol kg–1 | /g cm–3 | V/cm3 mol–1 | C, /J K–1 mol–1 |
| --- | --- | --- | --- |
| 288.15 K | | | |
| 0.15673  0.14590  0.13774  0.12177  0.10871  0.09782  0.08507  0.06944  0.05812  0.04683 | 1.002282  1.002061  1.001901  1.001576  1.001317  1.001093  1.000834  1.000519  1.000288  1.000057 | 137.57 (0.02)a  137.61 (0.02)  137.59 (0.02)  137.64 (0.03)  137.62 (0.03)  137.67 (0.03)  137.70 (0.04)  137.69 (0.04)  137.72 (0.05)  137.76 (0.07) | 489.6 (1.4)a  489.2 (1.5)  489.1 (1.6)  490.9 (1.7)  490.5 (1.9)  489.5 (2.0)  490.5 (1.9)  490.8 (2.8)  492.3 (3.3)  492.0 (5.2) |
| 298.15 K | | | |
| 0.15863  0.14564  0.13478  0.12332  0.10842  0.10089  0.08887  0.07787  0.06504  0.04740 | 1.000118  0.999866  0.999657  0.999438  0.999153  0.999007  0.998778  0.998567  0.998315  0.997975 | 138.77 (0.02)  138.81 (0.02)  138.83 (0.02)  138.83 (0.03)  138.84 (0.03)  138.85 (0.03)  138.83 (0.03)  138.82 (0.04)  138.88 (0.05)  138.85 (0.06) | 503.3 (1.3)  500.7 (1.8)  499.4 (1.4)  503.5 (1.6)  502.4 (1.8)  502.5 (1.9)  505.3 (2.9)  501.4 (2.1)  502.7 (3.9)  503.0 (2.6) |

Table 3 (contd)

| 313.15 K | | | |
| --- | --- | --- | --- |
| 0.15751  0.14573  0.13806  0.13241  0.12057  0.11764  0.10987  0.09772  0.09420  0.08464  0.07161  0.05858  0.04822  0.03607  0.02996 | 0.995080  0.994870  0.994732  -  -  0.994364  0.994217  -  0.993941  0.993762  0.993532  0.993295  0.993104  0.992885  0.992773 | 140.59 (0.02)  140.59 (0.02)  140.60 (0.02)  -  -  140.62 (0.03)  140.69 (0.03)  -  140.63 (0.03)  140.70 (0.04)  140.63 (0.04)  140.63 (0.05)  140.67 (0.06)  140.59 (0.09)  140.58 (0.10) | 514.7 (1.8)  515.1 (1.4) 515.6 (1.6)  514.9 (1.6)  515.9 (1.7)  519.2 (1.7)  516.9 (2.4)  516.2 (2.1)  519.9 (1.8)  516.5 (2.4)  516.0 (2.0)  517.7 (2.9)  -  -  - |
| 328.15 K | | | |
| 0.14454  0.13303  0.12206  0.10904  0.09773  0.08501  0.07073  0.06011  0.04885 | 0.988176  0.987981  0.987793  0.987572  0.987380  0.987163  0.986924  0.986738  0.986544 | 142.48 (0.02)  142.49 (0.02)  142.51 (0.03)  142.52 (0.03)  142.52 (0.03)  142.52 (0.04)  142.45 (0.04)  142.50 (0.05)  142.51 (0.06) | 526.2 (1.1)  526.6 (1.4)  528.5 (3.1)  527.7 (1.2)  527.6 (3.3)  526.8 (1.7)  524.1 (2.1)  529.4 (4.2)  523.9 (2.7) |

a Estimated uncertainties are in parentheses.

**Table S4** Densities, apparent molar volumes and apparent molar heat capacities of aqueous solutions of N-acetylleucinamide at 288.15, 298.15, 313.15, and 328.15 K

| m/mol kg–1 | /g cm–3 | V/cm3 mol–1 | C, /J K–1 mol–1 |
| --- | --- | --- | --- |
| 288.15 K | | | |
| 0.15689  0.14484  0.13014  0.11483  0.10403  0.09028  0.07567  0.06708  0.05854  0.04789 | 1.001829  1.001626  1.001371  1.001103  1.000918  1.000678  1.000424  1.000276  1.000127  0.999940 | 154.54 (0.02)a  154.53 (0.02)  154.56 (0.02)  154.61 (0.03)  154.61 (0.03)  154.64 (0.03)  154.66 (0.04)  154.65 (0.05)  154.67 (0.05)  154.70 (0.06) | 585.3 (1.7)a  584.5 (1.8)  586.2 (2.0)  587.0 (2.2)  585.3 (2.0)  585.9 (2.2)  584.6 (2.4)  582.9 (2.9)  587.0 (2.2)  584.6 (2.4) |
| 298.15 K | | | |
| 0.15011  0.14424  0.12978  0.11979  0.10937  0.09963  0.09117  0.06901  0.05969  0.05080 | 0.999502  0.999408  0.999176  0.999010  0.998842  0.998683  0.998545  0.998183  0.998031  0.997885 | 155.90 (0.02)  155.91 (0.02)  155.91 (0.02)  155.95 (0.03)  155.95 (0.03)  155.97 (0.03)  155.98 (0.03)  156.00 (0.04)  156.00 (0.05)  156.02 (0.06) | 596.9 (1.3)  596.9 (1.3)  596.4 (1.5)  596.6 (1.7)  598.3 (1.4)  597.3 (1.4)  598.0 (1.4)  600.5 (2.6)  594.4 (3.0)  598.3 (2.4) |

Table 4 (contd)

| 313.15 K | | | |
| --- | --- | --- | --- |
| 0.16174  0.14675  0.13367  0.12217  0.11044  0.09920  0.08490  0.07171  0.06002  0.05003  0.03923 | 0.994612  0.994406  0.994215  0.994040  0.993869  0.993701  0.993493  0.993296  0.993120  -  0.992810 | 158.17 (0.02)  158.09 (0.02)  158.10 (0.02)  158.15 (0.03)  158.14 (0.03)  158.17 (0.03)  158.13 (0.04)  158.15 (0.04)  158.19 (0.05)  -  158.18 (0.08) | 607.2 (1.3)  609.9 (1.4)  606.0 (1.5)  606.1 (1.7)  607.4 (1.5)  610.1 (1.9)  610.3 (2.9)  610.1 (2.7)  607.9 (3.2)  608.8 (3.0)  - |
| 328.15 K | | | |
| 0.15743  0.14543  0.13388  0.12178  0.10918  0.09804  0.08501  0.07148  0.05822  0.04590 | 0.987849  0.987690  0.987531  0.987366  0.987204  0.987046  0.986872  0.986687  0.986502  0.986335 | 160.30 (0.02)  160.29 (0.02)  160.32 (0.02)  160.34 (0.03)  160.27 (0.03)  160.34 (0.03)  160.30 (0.04)  160.30 (0.04)  160.35 (0.05)  160.30 (0.07) | 616.9 (1.3)  612.8 (1.4)  616.6 (2.8)  614.5 (1.6)  613.0 (3.9)  614.1 (1.9)  617.8 (2.0)  612.1 (2.7)  615.4 (2.1)  - |

a Estimated uncertainties are in parentheses.

**Table S5** Densities and apparent molar volumes of aqueous solutions of N-acetylisoleucinamide at 288.15, 298.15, 313.15, and 328.15 K

| m/mol kg–1 | /g cm–3 | V/cm3 mol–1 | m/mol kg–1 | /g cm–3 | V/cm3 mol–1 |
| --- | --- | --- | --- | --- | --- |
| 288.15 K | | | | | |
| 0.011882  0.011448  0.010980  0.010480 | 0.999332  0.999324  0.999315  0.999307 | 152.87 (0.25)a  152.83 (0.26)  152.82 (0.27)  152.66 (0.29) | 0.009984  0.009514  0.008982  0.008678 | 0.999295  0.999284  0.999276  0.999269 | 152.89 (0.30)  153.08 (0.32)  152.84 (0.34)  152.96 (0.35) |
| 298.15 K | | | | | |
| 0.012039  0.011087  0.010069  0.008933  0.008112 | 0.997265  0.997254  0.997238  0.997217  0.997201 | 154.45 (0.25)  153.94 (0.27)  153.64 (0.30)  153.54 (0.34)  153.61 (0.37) | 0.012039  0.011087  0.010069  0.008933  0.008112 | 0.997272  0.997256  0.997232  0.997215  0.997196 | 153.88 (0.25)  153.73 (0.27)  154.22 (0.30)  153.80 (0.34)  154.18 (0.37) |
| 313.15 K | | | | | |
| 0.011962  0.011053  0.010222  0.009022  0.008074 | 0.992426  0.992412  0.992395  0.992372  0.992359 | 155.98 (0.26)  155.80 (0.28)  156.08 (0.30)  156.35 (0.34)  155.99 (0.38) | 0.011962  0.011053  0.010222  0.009022  0.008074 | 0.992427  0.992411  0.992394  0.992373  0.992361 | 155.88 (0.26)  155.91 (0.28)  156.19 (0.30)  156.22 (0.34)  155.70 (0.38) |
| 328.15 K | | | | | |
| 0.011996  0.011025  0.010031 | 0.985888  0.985872  0.985855 | 158.23 (0.26)  158.28 (0.28)  158.39 (0.31) | 0.009133  0.007993 | 0.985843  0.985824 | 158.14 (0.34)  158.23 (0.39) |

a The estimated uncertainty for each V is given in parentheses.
